# Supplementary material for: Molecular Details of the Frataxin–Scaffold Interaction during Mitochondrial Fe–S Cluster Assembly
Source: MDPI journal article supplement (doi:10.3390/ijms22116006), 2021-06-02
Supplement: s1 [file s1]

**Supplementary Table S1.**

| Function     | Residue   | Mutation | Location on Protein         | Organism  | Hs Equivalent | Reference  |
|--------------|-----------|----------|-----------------------------|-----------|---------------|------------|
| Iron Binding | E92       | E92A     | $\alpha 1$                  | <i>Hs</i> | E92           | [54]       |
|              | E96       | E96A     | $\alpha 1$                  | <i>Hs</i> | E96           | [54]       |
|              | E100      | E100A    | $\alpha 1$                  | <i>Hs</i> | E100          | [54]       |
|              | E101      | E101A    | $\alpha 1$                  | <i>Hs</i> | E101          | [54]       |
|              | D104      | D104A    | $\alpha 1$                  | <i>Hs</i> | D104          | [54]       |
|              | S105      | *1       | $\alpha 1$                  | <i>Hs</i> | S105          | [16]       |
|              | H83       | *1       | $\alpha 1$                  | <i>Sc</i> | S105          | [33]       |
|              | A107      | *1       | $\alpha 1$                  | <i>Hs</i> | A107          | [16]       |
|              | D86       | D86A     | $\alpha 1$                  | <i>Sc</i> | E108          | [33]       |
|              | E108      | E108A    | $\alpha 1$                  | <i>Hs</i> | E108          | [16]       |
|              | F109-F110 | *1       | $\alpha 1$                  | <i>Hs</i> | F109-F110     | [16]       |
|              | E111      | E111A    | $\alpha 1$                  | <i>Hs</i> | E111          | [53]       |
|              | D112      | D112A    | $\alpha 1$                  | <i>Hs</i> | D112          | [82]       |
|              | E90       | E90A     | $\alpha 1$                  | <i>Sc</i> | D112          | [33]       |
|              | L91       | *1       | $\alpha 1$                  | <i>Sc</i> | L113          | [34]       |
|              | L113-A114 | *1       | $\alpha 1$                  | <i>Hs</i> | L113-A114     | [16]       |
|              | E93       | E93A     | $\alpha 1$                  | <i>Sc</i> | D115          | [33]       |
|              | D115      | D115A    | $\alpha 1$ - $\beta 1$ Loop | <i>Hs</i> | D115          | [82]       |
|              | A94       | *1       | $\alpha 1$                  | <i>Sc</i> | K116          | [33]       |
|              | K116      | *1       | $\alpha 1$ - $\beta 1$ Loop | <i>Hs</i> | K116          | [16]       |
|              | H95       | *1       | $\alpha 1$                  | <i>Sc</i> | P117          | [33]       |
|              | E121      | E121A    | $\alpha 1$ - $\beta 1$ Loop | <i>Hs</i> | E121          | [82]       |
|              | D122      | D122A/Y  | $\beta 1$                   | <i>Hs</i> | D122          | [82] [54]  |
|              | Y123      | *1       | $\beta 1$                   | <i>Hs</i> | Y123          | [16]       |
|              | D124      | D124A    | $\beta 1$                   | <i>Hs</i> | D124          | [82]       |
|              | D101      | D101A    | $\beta 1$                   | <i>Sc</i> | D124          | [33]       |
|              | V102      | *1       | $\beta 1$                   | <i>Sc</i> | V125          | [18]       |
|              | V125-F127 | *1       | $\beta 1$                   | <i>Hs</i> | V125-F127     | [16]       |
|              | E103      | E103A    | $\beta 1$                   | <i>Sc</i> | S126          | [33]       |
|              | L104      | *1       | $\beta 1$                   | <i>Sc</i> | F127          | [33]       |
|              | S105      | *1       | $\beta 1$                   | <i>Sc</i> | G128          | [33]       |
|              | G130      | G130V    | $\beta 1$                   | <i>Hs</i> | G130          | [54]       |
|              | I154      | I154F    | $\beta 4$                   | <i>Hs</i> | I154          | [54]       |
|              | W155      | W155R    | $\beta 4$                   | <i>Hs</i> | W155          | [54]       |
|              | N140      | *1       | $\beta 4$ - $\beta 5$ Loop  | <i>Sc</i> | K164          | [33]       |
| NFS Binding  | D104-S105 | *1       | $\alpha 1$                  | <i>Hs</i> | D104-S105     | [16]       |
|              | E108-F109 | *1       | $\alpha 1$                  | <i>Hs</i> | E108-F109     | [18]       |
|              | F110      | *1       | $\alpha 1$                  | <i>Hs</i> | F110          | [16]       |
|              | E111      | *1       | $\alpha 1$                  | <i>Hs</i> | E111          | [18]       |
|              | D112-A114 | *1       | $\alpha 1$                  | <i>Hs</i> | D112-A114     | [16]       |
|              | D115-T119 | *1       | $\alpha 1$ - $\beta 1$ Loop | <i>Hs</i> | D115-T119     | [16]       |
|              | E121-Y123 | *2       | $\alpha 1$ - $\beta 1$ Loop | <i>Hs</i> | E121-Y123     | [18]       |
|              | D124      | D124A/K  | $\beta 1$                   | <i>Hs</i> | D124          | [18,55]    |
|              | V125-F127 | *1       | $\beta 1$                   | <i>Hs</i> | V125-F127     | [16]       |
|              | G128      | *2       | $\beta 1$                   | <i>Hs</i> | G128          | [18]       |
|              | V131      | *2       | $\beta 2$                   | <i>Hs</i> | V131          | [18]       |
|              | N146      | N146K    | $\beta 3$                   | <i>Hs</i> | N146          | [18]       |
|              | K147      | *4       | $\beta 3$                   | <i>Hs</i> | K147          | [86]       |
|              | N151      | N151A    | $\beta 3$ - $\beta 4$ Loop  | <i>Hs</i> | N151          | [18]       |
|              | K152      | *4       | $\beta 3$ - $\beta 4$ Loop  | <i>Hs</i> | K152          | [86]       |
|              | I154      | I154F    | $\beta 4$                   | <i>Hs</i> | I154          | [18], [54] |
|              | W155      | W155R    | $\beta 4$                   | <i>Hs</i> | W155          | [18] [54]  |
|              | K171-N172 | *1       | $\beta 5$ - $\beta 6$ Loop  | <i>Hs</i> | K171-N172     | [16]       |
|              | W149      | W149G    | $\beta 6$                   | <i>Sc</i> | W173          | [35]       |
|              | Y175      | *2       | $\beta 6$                   | <i>Hs</i> | Y175          | [18]       |
|              | H177      | *2       | $\beta 6$ - $\alpha 2$ Loop | <i>Hs</i> | H177          | [18]       |
|              | A204      | *1       | C-Termini                   | <i>Hs</i> | A204          | [16]       |

|              |           |            |                             |           |           |         |
|--------------|-----------|------------|-----------------------------|-----------|-----------|---------|
| ISCU Binding | G107      | *1         | $\beta 1$ - $\beta 2$ Loop  | <i>Sc</i> | G130      | [18]    |
|              | T110      | *1         | $\beta 2$                   | <i>Sc</i> | V134      | [18]    |
|              | L111      | *1         | $\beta 2$                   | <i>Sc</i> | K135      | [18]    |
|              | T142      | *2         | $\beta 3$                   | <i>Hs</i> | T142      | [18]    |
|              | Y119      | *1         | $\beta 3$                   | <i>Sc</i> | Y143      | [18]    |
|              | V120      | *1         | $\beta 3$                   | <i>Sc</i> | V144      | [38]    |
|              | V144      | *2         | $\beta 3$                   | <i>Hs</i> | V144      | [18]    |
|              | N122      | N122A/K    | $\beta 3$                   | <i>Sc</i> | N146      | [42]    |
|              | I145-K147 | *1         | $\beta 3$                   | <i>Hs</i> | I145-K147 | [16]    |
|              | K123      | K123T      | $\beta 3$                   | <i>Sc</i> | K147      | [42]    |
|              | Q124      | Q124A      | $\beta 3$                   | <i>Sc</i> | Q148      | [42]    |
|              | T149      | *1         | $\beta 3$ - $\beta 4$ Loop  | <i>Hs</i> | T149      | [16]    |
|              | P150      | *2         | $\beta 3$ - $\beta 4$ Loop  | <i>Hs</i> | P150      | [18]    |
|              | N151      | N151A      | $\beta 3$ - $\beta 4$ Loop  | <i>Hs</i> | N151      | [18]    |
|              | N127      | *1         | $\beta 3$ - $\beta 4$ Loop  | <i>Sc</i> | N151      | [34]    |
|              | K152      | *1         | $\beta 3$ - $\beta 4$ Loop  | <i>Hs</i> | K152      | [16]    |
|              | Q153      | *1         | $\beta 4$                   | <i>Hs</i> | Q153      | [16]    |
|              | Q129      | Q129A      | $\beta 3$ - $\beta 4$ Loop  | <i>Sc</i> | Q153      | [32]    |
|              | I154      | I154F      | $\beta 4$                   | <i>Hs</i> | I154      | [54]    |
|              | W155      | W155R/A/F  | $\beta 4$                   | <i>Hs</i> | W155      | [54,77] |
|              | W131      | W131A/F    | $\beta 4$                   | <i>Sc</i> | W155      | [32]    |
|              | L156-S158 | *1         | $\beta 4$                   | <i>Hs</i> | L156-S158 | [16]    |
|              | P163      | P163G      | $\beta 5$                   | <i>Hs</i> | P163      | [18]    |
|              | K164      | *1         | $\beta 5$                   | <i>Hs</i> | K164      | [16]    |
|              | R165      | R165C      | $\beta 5$                   | <i>Hs</i> | R165      | [18]    |
|              | R141      | R141A      | $\beta 5$                   | <i>Sc</i> | R165      | [32]    |
|              | W168      | *1         | $\beta 5$                   | <i>Hs</i> | W168      | [16]    |
|              | N154      | *1         | $\beta 6$ - $\beta 7$ Loop  | <i>Sc</i> | D178      | [34]    |
|              | V166      | *1         | $\alpha 2$                  | <i>Sc</i> | L190      | [34]    |
|              | I170      | *1         | $\alpha 2$                  | <i>Sc</i> | L194      | [34]    |
| Stability    | L106      | L106S      | $\alpha 1$                  | <i>Hs</i> | L106      | [60]    |
|              | D86       | D86A       | $\alpha 1$                  | <i>Sc</i> | E108      | [33]    |
|              | F109      | F109L      | $\alpha 1$                  | <i>Hs</i> | F109      | [61]    |
|              | E93       | E93A       | $\alpha 1$                  | <i>Sc</i> | D115      | [33]    |
|              | D122      | D122Y      | B1                          | <i>Hs</i> | D122      | [54]    |
|              | Y123      | Y123S      | $\alpha 1$ - $\beta 1$ Loop | <i>Hs</i> | Y123      | [61]    |
|              | D101      | I01A       | $\beta 1$                   | <i>Sc</i> | D124      | [33]    |
|              | E103      | I03A       | $\beta 1$                   | <i>Sc</i> | S126      | [33]    |
|              | G130      | G130Y      | $\beta 1$                   | <i>Hs</i> | G130      | [54]    |
|              | T110A     | T110A      | $\beta 2$                   | <i>Sc</i> | V134      | [32]    |
|              | G137      | G137V      | $\beta 2$ - $\beta 3$ Loop  | <i>Hs</i> | G137      | [84]    |
|              | T118A     | T118A      | $\beta 3$                   | <i>Sc</i> | T142      | [32]    |
|              | V120      | V120A      | $\beta 3$                   | <i>Sc</i> | V144      | [32]    |
|              | Q129A     | Q129A      | $\beta 3$ - $\beta 4$ Loop  | <i>Sc</i> | Q153      | [32]    |
|              | I130      | I130A      | $\beta 4$                   | <i>Sc</i> | I154      | [32]    |
|              | I154      | I154F      | $\beta 4$                   | <i>Hs</i> | I154      | [54]    |
|              | W155      | W155R      | $\beta 4$                   | <i>Hs</i> | W155      | [54]    |
|              | W131      | W131A/F    | $\beta 4$                   | <i>Sc</i> | W155      | [32]    |
|              | L132      | L132A      | $\beta 4$                   | <i>Sc</i> | L156      | [32]    |
|              | S161      | S161I      | $\beta 4$ - $\beta 5$ Loop  | <i>Hs</i> | S161      | [61]    |
|              | W173      | W173G      | $\beta 6$                   | <i>Hs</i> | W173      | [85]    |
|              | S181      | S181F      | $\alpha 2$                  | <i>Hs</i> | S181      | [61]    |
|              | L182      | L182F      | $\alpha 2$                  | <i>Hs</i> | L182      | [56]    |
|              | L185-L186 | *3         | $\alpha 2$                  | <i>Hs</i> | L185-L186 | [56]    |
|              | L190      | *3         | $\alpha 2$                  | <i>Hs</i> | L190      | [56]    |
|              | L194      | *3         | $\alpha 2$                  | <i>Hs</i> | L194      | [56]    |
|              | T196-K197 | Truncation | C-Termini                   | <i>Hs</i> | T196-K197 | [56]    |
|              | L198      | L198R/A/C  | C-Termini                   | <i>Hs</i> | L198      | [57]    |
|              | D199      | Truncation | C-Termini                   | <i>Hs</i> | D199      | [56]    |
|              | L200      | L200C      | C-Termini                   | <i>Hs</i> | L200      | [57]    |

---

\*1 Chemical shifts observed by NMR

\*2 Cryo-EM confirmed predictions from crosslinking, SAXS and NMR

\*3 Modeling

\*4 LC-MS/MS Analysis
